# Supplementary material
Source: publisher site journal article supplement (https://www.dovepress.com/article/484680)
Supplement: Supplementary file 1 [file get_supplementary_file.php]

Table S1. The calculation of ALFF, ReHo, VMHC and DC values based on previous studies using DPARSF.

| Measure | Abbreviation | Method |
| --- | --- | --- |
| amplitude of low-frequency fluctuations | ALFF | The ALFF was the Fourier transform amplitude of each voxel time series within a defined frequency range (0.01~0.1 Hz), which has been to reflect the intensity of regional spontaneous brain activity. |
| regional homogeneity | ReHo | ReHo measures the functional coherence of adjacent voxels by calculating the Kendall's coefficient concordance (KCC) of the time series of a given voxel with those of its nearest neighbors (26 adjacent voxels), therefore serving as a measure of regional synchronicity. |
| voxel-mirrored homotopy connectivity | VMHC | VMHC can be used to determine how consistently the intrinsic time series of any given voxel correlates with its contralateral counterpart in the other hemisphere, hence measuring voxel-wise interhemispheric connectivity(1). |
| degree centrality | DC | DC was the weighted summation of the voxels with Pearson’ s correlation coefficient greater than the threshold (r > 0.25) with all other voxels in the whole brain(2). |

Table S2. The classification of all features.

| category | | NF | Features |
| --- | --- | --- | --- |
| First order features | | 18 | Energy, Total Energy, Entropy, Minimum, 10th percentile, 90th percentile, Maximum, Mean, Median, Interquartile Range, Range, Mean Absolute Deviation, Robust Mean Absolute Deviation, Root Mean Squared, Skewness, Kurtosis, Variance, Uniformity |
| Texture features | GLCM | 22 | Autocorrelation, Joint Average, Cluster Prominence, Cluster Shade, Cluster Tendency, Contrast, Correlation, Difference Average, Difference Entropy, Difference Variance, Joint Energy, Joint Entropy, Informational Measure of Correlation 1, Informational Measure of Correlation 2, Inverse Difference Moment, Inverse Difference Moment Normalized, Inverse Difference, Inverse Difference Normalized, Inverse Variance, Maximum Probability, Sum Entropy, Sum of Squares |
| GLRLM | 16 | Short Run Emphasis, Long Run Emphasis, Gray Level Non-Uniformity, Gray Level Non-Uniformity Normalized, Run Length Non-Uniformity, Run Length Non-Uniformity Normalized, Run Percentage, Gray Level Variance, Run Variance, Run Entropy, Low Gray Level Run Emphasis, High Gray Level Run Emphasis, Short Run Low Gray Level Emphasis, Short Run High Gray Level Emphasis, Long Run Low Gray Level Emphasis, Long Run High Gray Level Emphasis |
| GLSZM | 16 | Small Area Emphasis, Large Area Emphasis, Gray Level Non-Uniformity, Gray Level Non-Uniformity Normalized, Size-Zone Non-Uniformity, Size-Zone Non-Uniformity Normalized, Zone Percentage, Gray Level Variance, Zone Variance, Zone Entropy, Low Gray Level Zone Emphasis, High Gray Level Zone Emphasis, Small Area Low Gray Level Emphasis, Small Area High Gray Level Emphasis, Large Area Low Gray Level Emphasis, Large Area High Gray Level Emphasis |
| GLDM | 14 | Small Dependence Emphasis, Large Dependence Emphasis, Gray Level Non-Uniformity, Dependence Non-Uniformity, Dependence Non-Uniformity Normalized, Gray Level Variance, Dependence Variance, Dependence Entropy, Low Gray Level Emphasis, High Gray Level Emphasis, Small Dependence Low Gray Level Emphasis, Small Dependence High Gray Level Emphasis, Large Dependence Low Gray Level Emphasis, Large Dependence High Gray Level Emphasis |
| NGTDM | 5 | Coarseness, Contrast, Busyness, Complexity, Strength |
| Filters | Wavelet | 91*8 | First order features + Texture features |

Note: NF, Number of features; GLCM, gray-level cooccurrence matrix, GLRLM, gray-level run-length matrix, GLSZM, gray-level size zone matrix, NGTDM, neighborhood gray-tone difference matrix; GLDM, gray-level dependence matrix.

Table S3. The weight coefficient of selected feature for classification.

| NF | Radiomics features name | Weight Coefficient |
| --- | --- | --- |
| DC |  |  |
| 1 | original_glszm_GrayLevelNonUniformity | 0.020 |
| 2 | original_glszm_SmallAreaLowGrayLevelEmphasis | -0.041 |
| 3 | original_ngtdm_Coarseness | 0.013 |
| 4 | wavelet-HHH_firstorder_TotalEnergy | -0.009 |
| 5 | wavelet-HHH_glcm_ClusterShade | -0.026 |
| 6 | wavelet-HHH_ngtdm_Coarseness | -0.071 |
| 7 | wavelet-HHL_glszm_SmallAreaEmphasis | -0.093 |
| 8 | wavelet-HLL_firstorder_TotalEnergy | -0.009 |
| 9 | wavelet-HLL_glcm_ClusterShade | -0.002 |
| 10 | wavelet-LHH_firstorder_Median | 0.050 |
| ALFF |  |  |
| 1 | wavelet-HHL_firstorder_Median | -0.036 |
| 2 | wavelet-LHH_ngtdm_Coarseness | 0.064 |
| 3 | wavelet-LHL_firstorder_Mean | -0.044 |
| 4 | wavelet-LLL_glcm_Correlation | 0.043 |
| 5 | wavelet-LLL_glszm_ZoneVariance | -0.009 |
| ReHo |  |  |
| 1 | wavelet-HHH_glszm_LowGrayLevelZoneEmphasis | -0.043 |
| 2 | wavelet-HHL_firstorder_Skewness | 0.030 |
| 3 | wavelet-HHL_glszm_GrayLevelNonUniformity | -0.008 |
| 4 | wavelet-HLL_firstorder_Skewness | -0.006 |
| 5 | wavelet-LHH_glcm_Idn | -0.004 |
| 6 | wavelet-LHH_ngtdm_Contrast | 0.029 |
| 7 | wavelet-LHL_glcm_Correlation | -0.107 |
| 8 | wavelet-LHL_glcm_Idn | -0.007 |
| 9 | wavelet-LHL_glszm_SmallAreaLowGrayLevelEmphasis | 0.016 |
| 10 | wavelet-LLH_glcm_Idn | -0.077 |
| 11 | wavelet-LLL_ngtdm_Coarseness | 0.000 |
| VMHC |  |  |
| 1 | wavelet-HHH_glszm_GrayLevelNonUniformity | -0.035 |
| 2 | wavelet-HLL_glcm_Idn | 0.010 |
| 3 | wavelet-LLH_firstorder_Maximum | -0.008 |
| 4 | wavelet-LLH_firstorder_Median | -0.012 |
| 5 | wavelet-LLL_glcm_MaximumProbability | 0.069 |

Note: NF, Number of features; GLCM, gray-level cooccurrence matrix, GLRLM, gray-level run-length matrix, GLSZM, gray-level size zone matrix, NGTDM, neighborhood gray-tone difference matrix; GLDM, gray-level dependence matrix.

Table S4. The classification results of hippocampal functional radiomic models developed by other machine learning algorithms

| imaging metric | data set | SVM model | | | | | MLP model | | | | | | KNN model | | | | | |
| --- | --- | --- | --- | --- | --- | --- | --- | --- | --- | --- | --- | --- | --- | --- | --- | --- | --- | --- |
| AUC (95%CI) | ACC | SN | SP | AUC (95%CI) | | | ACC | | SN | SP | SP AUC (95%CI) | | ACC | | SN | SP |
| Modeling of hippocampal radiomics features derived from single imaging metric | | | | | | | | | | | | | | | | | | |
| DC | train | 0.904 | 0.847 | 0.844 | 0.852 | 0.815 | | | 0.797 | | 0.719 | 0.889 | 0.695 | | 0.755 | | 0.438 | 1.000 |
| test | 0.651 | 0.692 | 0.923 | 0.462 | 0.793 | | | 0.846 | | 0.923 | 0.833 | 0.577 | | 0.565 | | 0.308 | 0.917 |
| ALFF | train | 0.182 | 0.559 | 1.000 | 0.000 | 0.762 | | | 0.712 | | 0.697 | 0.731 | 0.639 | | 0.576 | | 0.394 | 0.808 |
| test | 0.708 | 0.731 | 0.667 | 0.786 | 0.315 | | | 0.577 | | 0.083 | 1.000 | 0.494 | | 0.500 | | 0.583 | 0.462 |
| ReHo | train | 0.977 | 0.932 | 0.938 | 0.926 | 0.909 | | | 0.847 | | 0.906 | 0.778 | 0.812 | | 0.729 | | 0.625 | 0.852 |
|  | test | 0.757 | 0.769 | 0.615 | 0.923 | 0.775 | | | 0.731 | | 0.615 | 0.846 | 0.642 | | 0.615 | | 0.385 | 0.846 |
| VMHC | train | 0.926 | 0.864 | 0.867 | 0.862 | 0.800 | | | 0.729 | | 0.567 | 0.897 | 0.815 | | 0.712 | | 0.800 | 0.621 |
|  | test | 0.791 | 0.731 | 0.667 | 0.818 | 0.836 | | | 0.808 | | 0.933 | 0.636 | 0.809 | | 0.769 | | 0.733 | 0.900 |
| Modeling of hippocampal radiomics features derived from two imaging metrics | | | | | | | | | | | | | | | | | | |
| ALFF+DC | train | 0.964 | 0.898 | 0.844 | 0.963 | 0.936 | | | 0.864 | | 0.812 | 0.926 | 0.813 | | 0.712 | | 0.531 | 0.926 |
| test | 0.704 | 0.731 | 0.769 | 0.692 | 0.680 | | | 0.692 | | 0.923 | 0.500 | 0.506 | | 0.538 | | 0.231 | 1.000 |
| ALFF+ReHo | train | 0.993 | 0.966 | 0.969 | 0.969 | 0.965 | | | 0.868 | | 0.875 | 0.926 | 0.822 | | 0.780 | | 0.938 | 0.593 |
| test | 0.737 | 0.769 | 0.769 | 0.769 | 0.870 | | | 0.808 | | 0.923 | 0.692 | 0.763 | | 0.731 | | 0.769 | 0.750 |
| ALFF+VMHC | train | 0.975 | 0.966 | 1.000 | 0.933 | 0.930 | | | 0.864 | | 0.897 | 0.833 | 0.749 | | 0.678 | | 0.552 | 0.800 |
| test | 0.650 | 0.808 | 0.938 | 0.667 | 0.688 | | | 0.731 | | 0.750 | 0.700 | 0.506 | | 0.615 | | 0.875 | 0.286 |
| DC+ReHo | train | 0.992 | 0.983 | 1.000 | 0.963 | 0.965 | | | 0.932 | | 0.969 | 0.889 | 0.889 | | 0.831 | | 0.906 | 0.741 |
| test | 0.811 | 0.769 | 0.769 | 0.769 | 0.763 | | | 0.769 | | 0.923 | 0.615 | 0.713 | | 0.692 | | 0.923 | 0.462 |
| DC+VMHC | train | 0.975 | 0.932 | 0.938 | 0.926 | 0.916 | | | 0.864 | | 0.969 | 0.741 | 0.876 | | 0.814 | | 0.688 | 0.963 |
| test | 0.716 | 0.692 | 0.846 | 0.538 | 0.769 | | | 0.769 | | 0.692 | 0.917 | 0.778 | | 0.731 | | 0.615 | 0.917 |
| ReHo+VMHC | train | 0.990 | 0.966 | 1.000 | 0.926 | 0.940 | | | 0.898 | | 0.938 | 0.852 | 0.784 | | 0.712 | | 0.625 | 0.815 |
| test | 0.763 | 0.769 | 1.000 | 0.538 | 0.728 | | | 0.692 | | 0.923 | 0.462 | 0.751 | | 0.692 | | 0.846 | 0.583 |
| Modeling of hippocampal radiomics features derived from three imaging metrics | | | | | | | | | | | | | | | | | | |
| ALFF+DC+  ReHo | train | 0.990 | 0.949 | 1.000 | 0.889 | 0.972 | | | 0.915 | | 0.875 | 0.963 | 0.849 | | 0.780 | | 0.812 | 0.741 |
| test | 0.888 | 0.846 | 0.769 | 0.923 | 0.935 | | | 0.923 | | 0.846 | 1.000 | 0.811 | | 0.769 | | 0.769 | 0.833 |
| ALFF+DC+  VMHC | train | 0.975 | 0.949 | 0.938 | 0.963 | 0.948 | | | 0.915 | | 0.938 | 0.889 | 0.861 | | 0.746 | | 0.562 | 0.963 |
| test | 0.763 | 0.731 | 0.769 | 0.692 | 0.722 | | | 0.692 | | 0.923 | 0.462 | 0.784 | | 0.731 | | 0.923 | 0.538 |
| ALFF+ReHo+  VMHC | train | 0.998 | 0.983 | 0.969 | 1.000 | 0.987 | | | 0.966 | | 0.969 | 0.963 | 0.810 | | 0.746 | | 0.938 | 0.519 |
| test | 0.858 | 0.808 | 0.692 | 0.923 | 0.893 | | | 0.846 | | 1.000 | 0.692 | 0.763 | | 0.731 | | 1.000 | 0.462 |
| DC+ReHo+  VMHC | train | 0.993 | 0.983 | 1.000 | 0.963 | 0.905 | | | 0.831 | | 0.906 | 0.741 | 0.992 | | 0.966 | | 1.000 | 0.926 |
| test | 0.828 | 0.808 | 0.846 | 0.769 | 0.811 | | | 0.769 | | 0.769 | 0.769 | 0.888 | | 0.846 | | 0.769 | 0.923 |
| Modeling of hippocampal radiomics features derived from four imaging metrics | | | | | | | | | | | | | | | | | | |
| ALFF+DC+  ReHo+VMHC | train | 0.994 | 0.966 | 0.969 | 0.963 | 0.969 | | 0.898 | | 0.812 | | 1.000 | | 0.912 | | 0.814 | 0.656 | 1.000 |
| test | 0.911 | 0.885 | 0.923 | 0.846 | 0.846 | | 0.769 | | 0.615 | | 0.923 | | 0.944 | | 0.962 | 1.000 | 0.923 |

Reference

1. Zuo XN*, et al.* (2010) Growing together and growing apart: regional and sex differences in the lifespan developmental trajectories of functional homotopy. *The Journal of neuroscience : the official journal of the Society for Neuroscience* 30(45):15034-15043.

2. Zuo XN*, et al.* (2012) Network centrality in the human functional connectome. *Cerebral cortex (New York, N.Y. : 1991)* 22(8):1862-1875.
